# Supplementary material
Source: PubMed Central journal article supplement (PMC8849905)
Supplement: mmc1.pdf [file mmc1.pdf]

**Supplementary Table S1. Information of clinical samples**

| Sample ID     | Sampling Date | Age (years) | Gender | Infection sources <sup>§</sup> | Infection stage* | Ct value (ORF1ab/N) <sup>†</sup> | Identification of SARS-CoV-2 strains by Sequencing |
|---------------|---------------|-------------|--------|--------------------------------|------------------|----------------------------------|----------------------------------------------------|
| 20SF5770      | 2020/3/19     | 54          | Male   | UK                             | Mild             | 37/36                            | Wild-type                                          |
| 20SF5783      | 2020/3/18     | 34          | Male   | Philippines                    | Moderate         | 28/28                            | Wild-type                                          |
| 20SF5774      | 2020/3/14     | 50          | Male   | Philippines                    | Mild             | 21/21                            | Wild-type                                          |
| 20SF5787      | 2020/3/19     | 56          | Female | Philippines                    | Moderate         | 21/22                            | Wild-type                                          |
| 20SF5787      | 2020/3/19     | 48          | Male   | Philippines                    | Moderate         | 28/28                            | Wild-type                                          |
| 20SF9238      | 2020/3/26     | 20          | Male   | UK                             | Asymptomatic     | 33/35                            | Wild-type                                          |
| 20SF13480     | 2021/3/18     | 22          | Male   | UK                             | Mild             | 34/35                            | Wild-type                                          |
| 2021A-XG01725 | 2021/2/7      | 54          | Male   | UAE                            | Asymptomatic     | 17/16                            | Alpha                                              |
| 2021A-XG01774 | 2021/2/5      | 46          | Male   | Iraq                           | Moderate         | 21/20                            | Alpha                                              |
| 2021A-XG02064 | 2021/2/15     | 27          | Male   | UAE                            | Moderate         | 24/23                            | Alpha                                              |
| 2021A-XG03594 | 2021/3/22     | 55          | Female | France                         | Moderate         | 17/16                            | Alpha                                              |
| 2021A-XG03595 | 2021/3/22     | 34          | Female | Zambia                         | Moderate         | 26/26                            | Alpha                                              |
| 2021A-XG03596 | 2021/3/22     | 34          | Male   | Zambia                         | Moderate         | 15/15                            | Alpha                                              |
| 2021A-XG03607 | 2021/3/24     | 49          | Female | Morocco                        | Moderate         | 18/16                            | Alpha                                              |
| 2021A-XG03612 | 2021/3/25     | 39          | Male   | Guyana                         | Asymptomatic     | 34/34                            | Alpha                                              |
| 2021A-XG03623 | 2021/3/27     | 71          | Female | Panama                         | Moderate         | 16/15                            | Alpha                                              |
| 2021A-XG04560 | 2021/5/6      | 44          | Male   | Iraq                           | Moderate         | 18/16                            | Alpha                                              |
| 2021A-XG04704 | 2021/5/9      | 23          | Female | Oman                           | Moderate         | 18/17                            | Alpha                                              |
| 2021A-XG04850 | 2021/5/13     | 31          | Male   | Cambodia                       | Moderate         | 21/22                            | Alpha                                              |
| 2021A-XG05194 | 2021/5/20     | 44          | Male   | China                          | Asymptomatic     | 19/18                            | Alpha                                              |
| 2021A-XG08048 | 2021/7/10     | 46          | Male   | Turkey                         | Moderate         | 16/16                            | Alpha                                              |
| 2021A-XG08145 | 2021/7/14     | 40          | Male   | Philippines                    | Asymptomatic     | 24/22                            | Alpha                                              |
| 2021A-XG08337 | 2021/7/19     | 29          | Female | China                          | Asymptomatic     | 17/16                            | Alpha                                              |
| 2021A-XG03265 | 2021/3/22     | 46          | Male   | Djibouti                       | Asymptomatic     | 16/16                            | Beta                                               |
| 2021A-XG02289 | 2021/2/22     | 35          | Male   | UAE                            | Moderate         | 23/23                            | Beta                                               |

|               |           |    |        |              |              |       |              |
|---------------|-----------|----|--------|--------------|--------------|-------|--------------|
| 2021A-XG02981 | 2021/3/9  | 43 | Male   | Mozambique   | Moderate     | 31/30 | Beta         |
| 2021A-XG03246 | 2021/3/18 | 45 | Male   | Djibouti     | Mild         | 18/18 | Beta         |
| 2021A-XG03255 | 2021/3/21 | 29 | Male   | Djibouti     | Mild         | 19/19 | Beta         |
| 2021A-XG03240 | 2021/3/18 | 41 | Male   | Djibouti     | Mild         | 14/13 | Beta         |
| 2021A-XG05824 | 2021/5/26 | 17 | Female | USA          | Moderate     | 18/17 | Beta         |
| 2021A-XG05827 | 2021/5/26 | 17 | Female | USA          | Mild         | 24/21 | Beta         |
| 2021A-XG06000 | 2021/5/31 | 29 | Male   | Philippines  | Moderate     | 23/23 | Beta         |
| 2021A-XG06386 | 2021/6/2  | 34 | Male   | Tanzania     | Moderate     | 15/16 | Beta         |
| 2021A-XG06552 | 2021/6/10 | 41 | Female | South Africa | Moderate     | 27/28 | Beta         |
| 2021A-XG06750 | 2021/6/14 | 38 | Female | Malaysia     | Asymptomatic | 26/26 | Beta         |
| 2021A-XG07514 | 2021/6/23 | 23 | Male   | Philippines  | Moderate     | 32/32 | Beta         |
| 2021A-XG07753 | 2021/6/25 | 27 | Female | Philippines  | Asymptomatic | 27/26 | Beta         |
| 2021A-XG07933 | 2021/7/7  | 35 | Male   | Philippines  | Asymptomatic | 22/22 | Beta         |
| 2021A-XG08741 | 2021/8/7  | 34 | Male   | Qatar        | Moderate     | 31/31 | Beta         |
| 2021A-XG08520 | 2021/7/27 | 31 | Male   | Iraq         | Moderate     | 15/13 | Delta        |
| 2021A-XG08527 | 2021/7/28 | 50 | Male   | Malaysia     | Moderate     | 19/18 | Delta        |
| 2021A-XG08542 | 2021/7/28 | 37 | Female | Malaysia     | Asymptomatic | 23/22 | Delta        |
| 2021A-XG08547 | 2021/7/29 | 30 | Male   | Turkey       | Mild         | 20/19 | Delta        |
| 2021A-XG08859 | 2021/8/13 | 43 | Male   | Iran         | Moderate     | 18/19 | Delta        |
| 2021A-XG09082 | 2021/8/24 | 29 | Male   | UAE          | Moderate     | 16/17 | Delta        |
| 2021A-XG09089 | 2021/8/24 | 45 | Female | Kenya        | Moderate     | 30/31 | Delta        |
| 2021A-XG08688 | 2021/8/5  | 49 | Female | Malaysia     | Moderate     | 21/21 | Delta        |
| 2021A-XG08689 | 2021/8/5  | 32 | Female | Kenya        | Moderate     | 15/15 | Delta        |
| 2021A-XG08692 | 2021/8/5  | 50 | Male   | Congo        | Moderate     | 16/16 | Delta        |
| 2021A-XG08693 | 2021/8/5  | 28 | Male   | Kenya        | Moderate     | 16/16 | Delta        |
| 2021A-XG08694 | 2021/8/5  | 31 | Female | USA          | Moderate     | 18/16 | Delta        |
| 2021A-XG08715 | 2021/8/6  | 29 | Male   | Kenya        | Asymptomatic | 30/30 | Delta        |
| 2021A-XG08905 | 2021/8/15 | 34 | Female | Philippines  | Moderate     | 24/22 | Delta (AY.1) |

|            |            |    |        |          |    |       |         |
|------------|------------|----|--------|----------|----|-------|---------|
| 21XG-10658 | 2021/12/13 | 67 | Male   | Canada   | NA | 23/25 | Omicron |
| 21XG-10659 | 2021/12/13 | 64 | Female | USA      | NA | 26/23 | Omicron |
| 21XG-10786 | 2021/12/16 | 28 | Male   | Ethiopia | NA | 20/17 | Omicron |
| 21XG-10790 | 2021/12/16 | 70 | Female | China    | NA | 20/19 | Omicron |
| 21XG-10794 | 2021/12/18 | 41 | Female | China    | NA | 25/25 | Omicron |

§ UK, United Kingdom; UAE, United Arab Emirates; USA, United States of America.

\*The severity of illness was assessed according to the guideline for COVID-19 (version 6.0) published by the National Health Commission of China. Asymptomatic carriers present with no clinical symptom but with a positive result of the pathogens tests of SARS-CoV-2 in respiratory tract specimens and so on; Mild patients have mild clinical symptoms and no pneumonia on chest imaging; Moderate patients have clinical symptoms (i.e. fever and respiratory tract symptoms) and pneumonia on chest imaging. NA, not available.

†Ct, Cycle threshold. SARS-CoV-2 positive oropharyngeal swab samples were detected by quantitative qRT-PCR assay targeting both ORF1a/b and nucleocapsid (NP) genes of SARS-CoV-2 according to the manufacturer's protocols (Easydiagnosis Biomedicine Co., Ltd, Wuhan, China). SARS-CoV-2 positive reaction was confirmed when cycle threshold (Ct) value is less than 40.

# Supplementary Figure S1

|                              | 1             | 10          | 20                                            | 30          | 40 | 50 | 60 | 70 |  |
|------------------------------|---------------|-------------|-----------------------------------------------|-------------|----|----|----|----|--|
| MN908947/Wuhan-Hu-1          | MFVFLVLLPLVSS | QCVNLTTRTQ  | LPPAYTNSFTRGVYYPDKVFRSSVLHSTQDLFLPFFSNVTWFHAI | HVSGTNGTKRF |    |    |    |    |  |
| OL672836/BA.1/Omicron        | MFVFLVLLPLVSS | QCVNLTTRTQ  | LPPAYTNSFTRGVYYPDKVFRSSVLHSTQDLFLPFFSNVTWFHAI | ..SGTNGTKRF |    |    |    |    |  |
| OL677199//BA.1/Omicron       | MFVFLVLLPLVSS | QCVNLTTRTQ  | LPPAYTNSFTRGVYYPDKVFRSSVLHSTQDLFLPFFSNVTWFHAI | ..SGTNGTKRF |    |    |    |    |  |
| EPI_ISL_7701122/BA.2/Omicron | MFVFLVLLPLVSS | QCVNLTTRTQS | ..YTNSFTRGVYYPDKVFRSSVLHSTQDLFLPFFSNVTWFHAI   | HVSGTNGTKRF |    |    |    |    |  |
| EPI_ISL_7747545/BA.2/Omicron | MFVFLVLLPLVSS | QCVNLTTRTQS | ..YTNSFTRGVYYPDKVFRSSVLHSTQDLFLPFFSNVTWFHAI   | HVSGTNGTKRF |    |    |    |    |  |
| EPI_ISL_7747552/BA.2/Omicron | MFVFLVLLPLVSS | QCVNLTTRTQS | ..YTNSFTRGVYYPDKVFRSSVLHSTQDLFLPFFSNVTWFHAI   | HVSGTNGTKRF |    |    |    |    |  |
| EPI_ISL_7605589/BA.3/Omicron | MFVFLVLLPLVSS | QCVNLTTRTQ  | LPPAYTNSFTRGVYYPDKVFRSSVLHSTQDLFLPFFSNVTWFHAI | ..SGTNGTKRF |    |    |    |    |  |
| EPI_ISL_7740766/BA.3/Omicron | MFVFLVLLPLVSS | QCVNLTTRTQ  | LPPAYTNSFTRGVYYPDKVFRSSVLHSTQDLFLPFFSNVTWFHAI | ..SGTNGTKRF |    |    |    |    |  |
| OU514176/B.1.1.7/Alpha       | MFVFLVLLPLVSS | QCVNLTTRTQ  | LPPAYTNSFTRGVYYPDKVFRSSVLHSTQDLFLPFFSNVTWFHAI | ..SGTNGTKRF |    |    |    |    |  |
| OU562608/B.1.1.7/Alpha       | MFVFLVLLPLVSS | QCVNLTTRTQ  | LPPAYTNSFTRGVYYPDKVFRSSVLHSTQDLFLPFFSNVTWFHAI | ..SGTNGTKRF |    |    |    |    |  |
| MZ895877/B.1.1.7/Alpha       | MFVFLVLLPLVSS | QCVNLTTRTQ  | LPPAYTNSFTRGVYYPDKVFRSSVLHSTQDLFLPFFSNVTWFHAI | ..SGTNGTKRF |    |    |    |    |  |
| MZ376663/B.1.351/Beta        | MFVFLVLLPLVSS | QCVNLTTRTQ  | LPPAYTNSFTRGVYYPDKVFRSSVLHSTQDLFLPFFSNVTWFHAI | HVSGTNGTKRF |    |    |    |    |  |
| MZ298840/B.1.351/Beta        | MFVFLVLLPLVSS | QCVNLTTRTQ  | LPPAYTNSFTRGVYYPDKVFRSSVLHSTQDLFLPFFSNVTWFHAI | HVSGTNGTKRF |    |    |    |    |  |
| MZ202314/B.1.351/Beta        | MFVFLVLLPLVSS | QCVNLTTRTQ  | LPPAYTNSFTRGVYYPDKVFRSSVLHSTQDLFLPFFSNVTWFHAI | HVSGTNGTKRF |    |    |    |    |  |
| OU492255/P.1/Gamma           | MFVFLVLLPLVSS | QCVNLTTRTQ  | LPPAYTNSFTRGVYYPDKVFRSSVLHSTQDLFLPFFSNVTWFHAI | HVSGTNGTKRF |    |    |    |    |  |
| MZ896669/P.1/Gamma           | MFVFLVLLPLVSS | QCVNLTTRTQ  | LPPAYTNSFTRGVYYPDKVFRSSVLHSTQDLFLPFFSNVTWFHAI | HVSGTNGTKRF |    |    |    |    |  |
| OU565182/P.1/Gamma           | MFVFLVLLPLVSS | QCVNLTTRTQ  | LPPAYTNSFTRGVYYPDKVFRSSVLHSTQDLFLPFFSNVTWFHAI | HVSGTNGTKRF |    |    |    |    |  |
| OU562629/B.1.617.2/Delta     | MFVFLVLLPLVSS | QCVNLTTRTQ  | LPPAYTNSFTRGVYYPDKVFRSSVLHSTQDLFLPFFSNVTWFHAI | HVSGTNGTKRF |    |    |    |    |  |
| MZ854387/B.1.617.2/Delta     | MFVFLVLLPLVSS | QCVNLTTRTQ  | LPPAYTNSFTRGVYYPDKVFRSSVLHSTQDLFLPFFSNVTWFHAI | HVSGTNGTKRF |    |    |    |    |  |
| OU539690/B.1.617.2/Delta     | MFVFLVLLPLVSS | QCVNLTTRTQ  | LPPAYTNSFTRGVYYPDKVFRSSVLHSTQDLFLPFFSNVTWFHAI | HVSGTNGTKRF |    |    |    |    |  |
| MZ857990/C.37/Lambda         | MFVFLVLLPLVSS | QCVNLTTRTQ  | LPPAYTNSFTRGVYYPDKVFRSSVLHSTQDLFLPFFSNVTWFHAI | HVSGTNGTKRF |    |    |    |    |  |
| MZ942542/C.37/Lambda         | MFVFLVLLPLVSS | QCVNLTTRTQ  | LPPAYTNSFTRGVYYPDKVFRSSVLHSTQDLFLPFFSNVTWFHAI | HVSGTNGTKRF |    |    |    |    |  |
| MZ953277/C.37/Lambda         | MFVFLVLLPLVSS | QCVNLTTRTQ  | LPPAYTNSFTRGVYYPDKVFRSSVLHSTQDLFLPFFSNVTWFHAI | HVSGTNGTKRF |    |    |    |    |  |
| MZ487800/B.1.617.1/Kappa     | MFVFLVLLPLVSS | QCVNLTTRTQ  | LPPAYTNSFTRGVYYPDKVFRSSVLHSTQDLFLPFFSNVTWFHAI | HVSGTNGTKRF |    |    |    |    |  |
| OU322235/B.1.617.1/Kappa     | MFVFLVLLPLVSS | QCVNLTTRTQ  | LPPAYTNSFTRGVYYPDKVFRSSVLHSTQDLFLPFFSNVTWFHAI | HVSGTNGTKRF |    |    |    |    |  |
| MZ746235/B.1.617.1/Kappa     | MFVFLVLLPLVSS | QCVNLTTRTQ  | LPPAYTNSFTRGVYYPDKVFRSSVLHSTQDLFLPFFSNVTWFHAI | HVSGTNGTKRF |    |    |    |    |  |
| OK025270/B.1.621/Mu          | MFVFLVLLPLVSS | QCVNLTTRTQ  | LPPAYTNSFTRGVYYPDKVFRSSVLHSTQDLFLPFFSNVTWFHAI | HVSGTNGTKRF |    |    |    |    |  |
| OU466149/B.1.621/Mu          | MFVFLVLLPLVSS | QCVNLTTRTQ  | LPPAYTNSFTRGVYYPDKVFRSSVLHSTQDLFLPFFSNVTWFHAI | HVSGTNGTKRF |    |    |    |    |  |
| OU571573/B.1.621/Mu          | MFVFLVLLPLVSS | QCVNLTTRTQ  | LPPAYTNSFTRGVYYPDKVFRSSVLHSTQDLFLPFFSNVTWFHAI | HVSGTNGTKRF |    |    |    |    |  |
| MZ687447/B.1.429/Epsilon     | MFVFLVLLPLVSI | QCVNLTTRTQ  | LPPAYTNSFTRGVYYPDKVFRSSVLHSTQDLFLPFFSNVTWFHAI | HVSGTNGTKRF |    |    |    |    |  |
| OU235436/B.1.429/Epsilon     | MFVFLVLLPLVSI | QCVNLTTRTQ  | LPPAYTNSFTRGVYYPDKVFRSSVLHSTQDLFLPFFSNVTWFHAI | HVSGTNGTKRF |    |    |    |    |  |
| OU282717/B.1.429/Epsilon     | MFVFLVLLPLVSI | QCVNLTTRTQ  | LPPAYTNSFTRGVYYPDKVFRSSVLHSTQDLFLPFFSNVTWFHAI | HVSGTNGTKRF |    |    |    |    |  |

  

|                              | 80              | 90         | 100     | 110        | 120        | 130     | 140   | 150      |                  |                  |
|------------------------------|-----------------|------------|---------|------------|------------|---------|-------|----------|------------------|------------------|
| MN908947/Wuhan-Hu-1          | DNPVLPFNDGVYFAS | TEKSNII    | IRGWI   | FGTTLDSKTQ | SLIVNNA    | TNVV    | IKVCF | QFCNDPFL | GV..YHKNNKSNMSEF |                  |
| OL672836/BA.1/Omicron        | DNPVLPFNDGVYFAS | IEKSNII    | IRGWI   | FGTTLDSKTQ | SLIVNNA    | TNVV    | IKVCF | QFCNDPFL | LD...HKNNKSNMSEF |                  |
| OL677199//BA.1/Omicron       | DNPVLPFNDGVYFAS | IEKSNII    | IRGWI   | FGTTLDSKTQ | SLIVNNA    | TNVV    | IKVCF | QFCNDPFL | LD...HKNNKSNMSEF |                  |
| EPI_ISL_7701122/BA.2/Omicron | DNPVLPFNDGVYFAS | TEKSNII    | IRGWI   | FGTTLDSKTQ | SLIVNNA    | TNVV    | IKVCF | QFCNDPFL | DV..YHKNNKSNMSEF |                  |
| EPI_ISL_7747545/BA.2/Omicron | DNPVLPFNDGVYFAS | TEKSNII    | IRGWI   | FGTTLDSKTQ | SLIVNNA    | TNVV    | IKVCF | QFCNDPFL | DV..YHKNNKSNMSEF |                  |
| EPI_ISL_7747552/BA.2/Omicron | DNPVLPFNDGVYFAS | TEKSNII    | IRGWI   | FGTTLDSKTQ | SLIVNNA    | TNVV    | IKVCF | QFCNDPFL | DV..YHKNNKSNMSEF |                  |
| EPI_ISL_7605589/BA.3/Omicron | DNPVLPFNDGVYFAS | IEKSNII    | IRGWI   | FGTTLDSKTQ | SLIVNNA    | TNVV    | IKVCF | QFCNDPFL | LD...HKNNKSNMSEF |                  |
| EPI_ISL_7740766/BA.3/Omicron | DNPVLPFNDGVYFAS | IEKSNII    | IRGWI   | FGTTLDSKTQ | SLIVNNA    | TNVV    | IKVCF | QFCNDPFL | LD...HKNNKSNMSEF |                  |
| OU514176/B.1.1.7/Alpha       | DNPVLPFNDGVYFAS | TEKSNII    | IRGWI   | FGTTLDSKTQ | SLIVNNA    | TNVV    | IKVCF | QFCNDPFL | GV..YHKNNKSNMSEF |                  |
| OU562608/B.1.1.7/Alpha       | DNPVLPFNDGVYFAS | TEKSNII    | IRGWI   | FGTTLDSKTQ | SLIVNNA    | TNVV    | IKVCF | QFCNDPFL | GV..YHKNNKSNMSEF |                  |
| MZ895877/B.1.1.7/Alpha       | DNPVLPFNDGVYFAS | TEKSNII    | IRGWI   | FGTTLDSKTQ | SLIVNNA    | TNVV    | IKVCF | QFCNDPFL | GV..YHKNNKSNMSEF |                  |
| MZ376663/B.1.351/Beta        | ANPVL           | PFNDGVYFAS | TEKSNII | IRGWI      | FGTTLDSKTQ | SLIVNNA | TNVV  | IKVCF    | QFCNDPFL         | GV..YHKNNKSNMSEF |
| MZ298840/B.1.351/Beta        | ANPVL           | PFNDGVYFAS | TEKSNII | IRGWI      | FGTTLDSKTQ | SLIVNNA | TNVV  | IKVCF    | QFCNDPFL         | GV..YHKNNKSNMSEF |
| MZ202314/B.1.351/Beta        | ANPVL           | PFNDGVYFAS | TEKSNII | IRGWI      | FGTTLDSKTQ | SLIVNNA | TNVV  | IKVCF    | QFCNDPFL         | GV..YHKNNKSNMSEF |
| OU492255/P.1/Gamma           | DNPVLPFNDGVYFAS | TEKSNII    | IRGWI   | FGTTLDSKTQ | SLIVNNA    | TNVV    | IKVCF | QFCNDPFL | GV..YHKNNKSNMSEF |                  |
| MZ896669/P.1/Gamma           | DNPVLPFNDGVYFAS | TEKSNII    | IRGWI   | FGTTLDSKTQ | SLIVNNA    | TNVV    | IKVCF | QFCNDPFL | GV..YHKNNKSNMSEF |                  |
| OU565182/P.1/Gamma           | DNPVLPFNDGVYFAS | TEKSNII    | IRGWI   | FGTTLDSKTQ | SLIVNNA    | TNVV    | IKVCF | QFCNDPFL | GV..YHKNNKSNMSEF |                  |
| OU562629/B.1.617.2/Delta     | DNPVLPFNDGVYFAS | TEKSNII    | IRGWI   | FGTTLDSKTQ | SLIVNNA    | TNVV    | IKVCF | QFCNDPFL | DV..YHKNNKSNMSE  |                  |
| MZ854387/B.1.617.2/Delta     | DNPVLPFNDGVYFAS | TEKSNII    | IRGWI   | FGTTLDSKTQ | SLIVNNA    | TNVV    | IKVCF | QFCNDPFL | DV..YHKNNKSNMSE  |                  |
| OU539690/B.1.617.2/Delta     | DNPVLPFNDGVYFAS | TEKSNII    | IRGWI   | FGTTLDSKTQ | SLIVNNA    | TNVV    | IKVCF | QFCNDPFL | GV..YHKNNKSNMSE  |                  |
| MZ857990/C.37/Lambda         | DNPVLPFNDGVYFAS | TEKSNII    | IRGWI   | FGTTLDSKTQ | SLIVNNA    | TNVV    | IKVCF | QFCNDPFL | GV..YHKNNKSNMSE  |                  |
| MZ942542/C.37/Lambda         | DNPVLPFNDGVYFAS | TEKSNII    | IRGWI   | FGTTLDSKTQ | SLIVNNA    | TNVV    | IKVCF | QFCNDPFL | GV..YHKNNKSNMSE  |                  |
| MZ953277/C.37/Lambda         | DNPVLPFNDGVYFAS | TEKSNII    | IRGWI   | FGTTLDSKTQ | SLIVNNA    | TNVV    | IKVCF | QFCNDPFL | GV..YHKNNKSNMSE  |                  |
| MZ487800/B.1.617.1/Kappa     | DNPVLPFNDGVYFAS | TEKSNII    | IRGWI   | FGTTLDSKTQ | SLIVNNA    | TNVV    | IKVCF | QFCNDPFL | DV..YHKNNKSNMSE  |                  |
| OU322235/B.1.617.1/Kappa     | DNPVLPFNDGVYFAS | TEKSNII    | IRGWI   | FGTTLDSKTQ | SLIVNNA    | TNVV    | IKVCF | QFCNDPFL | DV..YHKNNKSNMSE  |                  |
| MZ746235/B.1.617.1/Kappa     | DNPVLPFNDGVYFAS | IEKSNII    | IRGWI   | FGTTLDSKTQ | SLIVNNA    | TNVV    | IKVCF | QFCNDPFL | LD...HKNNKSNMSE  |                  |
| OK025270/B.1.621/Mu          | DNPVLPFNDGVYFAS | IEKSNII    | IRGWI   | FGTTLDSKTQ | SLIVNNA    | TNVV    | IKVCF | QFCNDPFL | LD...HKNNKSNMSE  |                  |
| OU466149/B.1.621/Mu          | DNPVLPFNDGVYFAS | IEKSNII    | IRGWI   | FGTTLDSKTQ | SLIVNNA    | TNVV    | IKVCF | QFCNDPFL | LD...HKNNKSNMSE  |                  |
| OU571573/B.1.621/Mu          | DNPVLPFNDGVYFAS | IEKSNII    | IRGWI   | FGTTLDSKTQ | SLIVNNA    | TNVV    | IKVCF | QFCNDPFL | LD...HKNNKSNMSE  |                  |
| MZ687447/B.1.429/Epsilon     | DNPVLPFNDGVYFAS | TEKSNII    | IRGWI   | FGTTLDSKTQ | SLIVNNA    | TNVV    | IKVCF | QFCNDPFL | GV..YHKNNKSNMSE  |                  |
| OU235436/B.1.429/Epsilon     | DNPVLPFNDGVYFAS | TEKSNII    | IRGWI   | FGTTLDSKTQ | SLIVNNA    | TNVV    | IKVCF | QFCNDPFL | GV..YHKNNKSNMSE  |                  |
| OU282717/B.1.429/Epsilon     | DNPVLPFNDGVYFAS | TEKSNII    | IRGWI   | FGTTLDSKTQ | SLIVNNA    | TNVV    | IKVCF | QFCNDPFL | GV..YHKNNKSNMSE  |                  |

















|                              |                |
|------------------------------|----------------|
| MN908947/Wuhan-Hu-1          | SEPVLKGVKLLHYY |
| OL672836/BA.1/Omicron        | SEPVLKGVKLLHYY |
| OL677199//BA.1/Omicron       | SEPVLKGVKLLHYY |
| EPI_ISL_7701122/BA.2/Omicron | SEPVLKGVKLLHYY |
| EPI_ISL_7747545/BA.2/Omicron | SEPVLKGVKLLHYY |
| EPI_ISL_7747552/BA.2/Omicron | SEPVLKGVKLLHYY |
| EPI_ISL_7605589/BA.3/Omicron | SEPVLKGVKLLHYY |
| EPI_ISL_7740766/BA.3/Omicron | SEPVLKGVKLLHYY |
| OU514176/B.1.1.7/Alpha       | SEPVLKGVKLLHYY |
| OU562608/B.1.1.7/Alpha       | SEPVLKGVKLLHYY |
| MZ895877/B.1.1.7/Alpha       | SEPVLKGVKLLHYY |
| MZ376663/B.1.351/Beta        | SEPVLKGVKLLHYY |
| MZ298840/B.1.351/Beta        | SEPVLKGVKLLHYY |
| MZ202314/B.1.351/Beta        | SEPVLKGVKLLHYY |
| OU492255/P.1/Gamma           | SEPVLKGVKLLHYY |
| MZ896669/P.1/Gamma           | SEPVLKGVKLLHYY |
| OU565182/P.1/Gamma           | SEPVLKGVKLLHYY |
| OU562629/B.1.617.2/Delta     | SEPVLKGVKLLHYY |
| MZ854387/B.1.617.2/Delta     | SEPVLKGVKLLHYY |
| OU539690/B.1.617.2/Delta     | SEPVLKGVKLLHYY |
| MZ857990/C.37/Lambda         | SEPVLKGVKLLHYY |
| MZ942542/C.37/Lambda         | SEPVLKGVKLLHYY |
| MZ953277/C.37/Lambda         | SEPVLKGVKLLHYY |
| MZ487800/B.1.617.1/Kappa     | SEPVLKGVKLLHYY |
| OU322235/B.1.617.1/Kappa     | SEPVLKGVKLLHYY |
| MZ746235/B.1.617.1/Kappa     | SEPVLKGVKLLHYY |
| OK025270/B.1.621/Mu          | SEPVLKGVKLLHYY |
| OU466149/B.1.621/Mu          | SEPVLKGVKLLHYY |
| OU571573/B.1.621/Mu          | SEPVLKGVKLLHYY |
| MZ687447/B.1.429/Epsilon     | SEPVLKGVKLLHYY |
| OU235436/B.1.429/Epsilon     | SEPVLKGVKLLHYY |
| OU282717/B.1.429/Epsilon     | SEPVLKGVKLLHYY |

# Supplementary Figure S2<sub>crRNA-S-37X</sub>

# crRNA-S-49X

Sample ID 21XG-10658 21XG-10659 21XG-10786 21XG-10790 21XG-10794

21XG-10658 21XG-10659 21XG-10786 21XG-10790 21XG-10794

**Omicron**

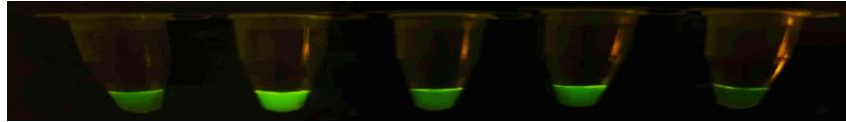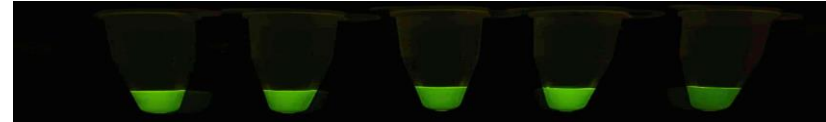

Sample ID 20SF5770 20SF5783 20SF5774 20SF5787 20SF5788 20SF9238 20SF13480

20SF5770 20SF5783 20SF5774 20SF5787 20SF5788 20SF9238 20SF13480

**WT**

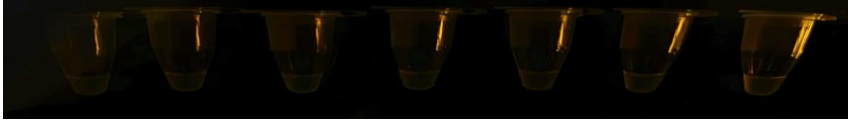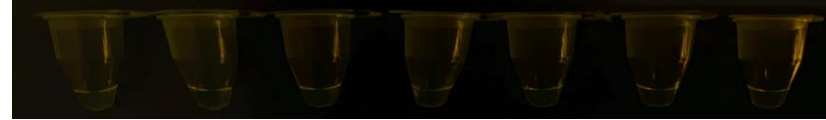

Sample ID

2021A-XG0 2021A-XG0 2021A-XG0 2021A-XG0 2021A-XG0 2021A-XG0 2021A-XG0 2021A-XG0  
1725 1774 2064 3594 3595 3596 3607 3612

2021A-XG0 2021A-XG0 2021A-XG0 2021A-XG0 2021A-XG0 2021A-XG0 2021A-XG0 2021A-XG0  
1725 1774 2064 3594 3595 3596 3607 3612

**Alpha**

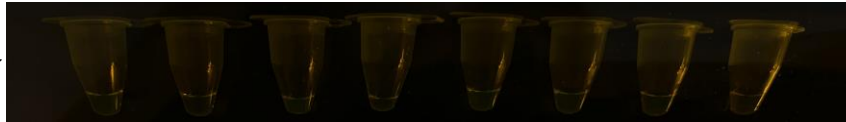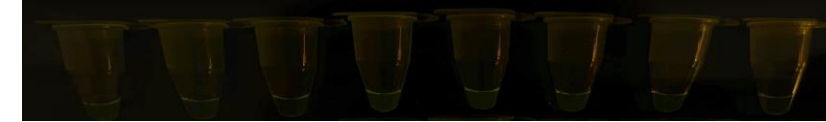

Sample ID

2021A-XG0 2021A-XG0 2021A-XG0 2021A-XG0 2021A-XG0 2021A-XG0 2021A-XG0 2021A-XG0  
3623 4560 4704 4850 5194 8048 8145 8337

2021A-XG0 2021A-XG0 2021A-XG0 2021A-XG0 2021A-XG0 2021A-XG0 2021A-XG0 2021A-XG0  
3623 4560 4704 4850 5194 8048 8145 8337

**Alpha**

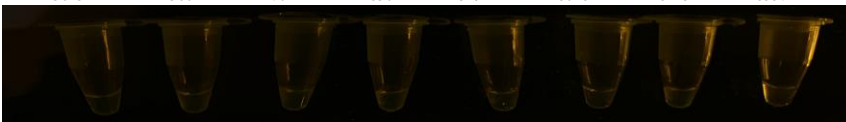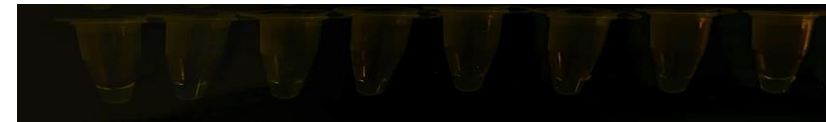

Sample ID

2021A-XG0 2021A-XG0 2021A-XG0 2021A-XG0 2021A-XG0 2021A-XG0 2021A-XG0 2021A-XG0  
3265 2289 2981 3246 3255 3240 5824 5827

2021A-XG0 2021A-XG0 2021A-XG0 2021A-XG0 2021A-XG0 2021A-XG0 2021A-XG0 2021A-XG0  
3265 2289 2981 3246 3255 3240 5824 5827

**Beta**

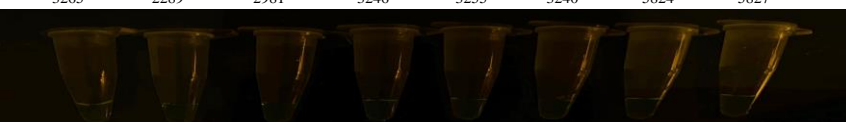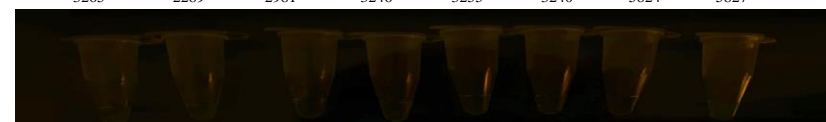

Sample ID

2021A-XG0 2021A-XG0 2021A-XG0 2021A-XG0 2021A-XG0 2021A-XG0 2021A-XG0 2021A-XG0  
6000 6386 6552 6750 7514 7753 7933 8741

2021A-XG0 2021A-XG0 2021A-XG0 2021A-XG0 2021A-XG0 2021A-XG0 2021A-XG0 2021A-XG0  
6000 6386 6552 6750 7514 7753 7933 8741

**Beta**

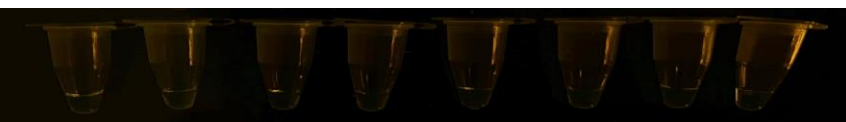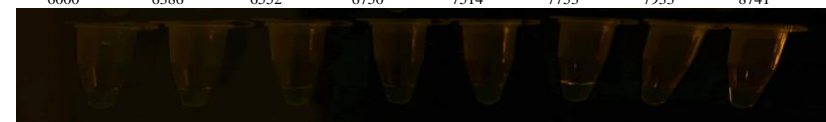

Sample ID

2021A-XG0 2021A-XG0 2021A-XG0 2021A-XG0 2021A-XG0 2021A-XG0 2021A-XG0  
8520 8527 8542 8547 8859 9082 9089

2021A-XG0 2021A-XG0 2021A-XG0 2021A-XG0 2021A-XG0 2021A-XG0 2021A-XG0  
8520 8527 8542 8547 8859 9082 9089

**Delta**

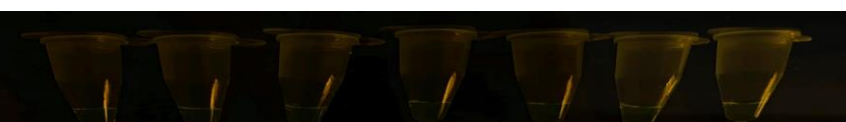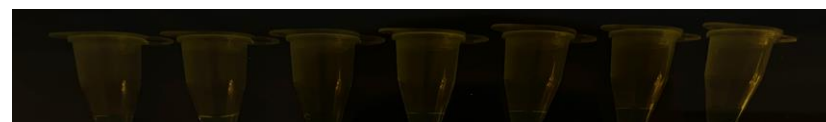

Sample ID

2021A-XG0 2021A-XG0 2021A-XG0 2021A-XG0 2021A-XG0 2021A-XG0 2021A-XG0  
8688 8689 8692 8693 8694 8715 8905

2021A-XG0 2021A-XG0 2021A-XG0 2021A-XG0 2021A-XG0 2021A-XG0 2021A-XG0  
8688 8689 8692 8693 8694 8715 8905

**Delta**

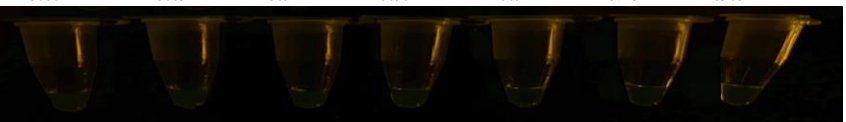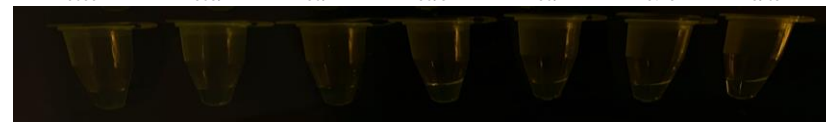

# Supplementary Figure S3

## crRNA-S-37X

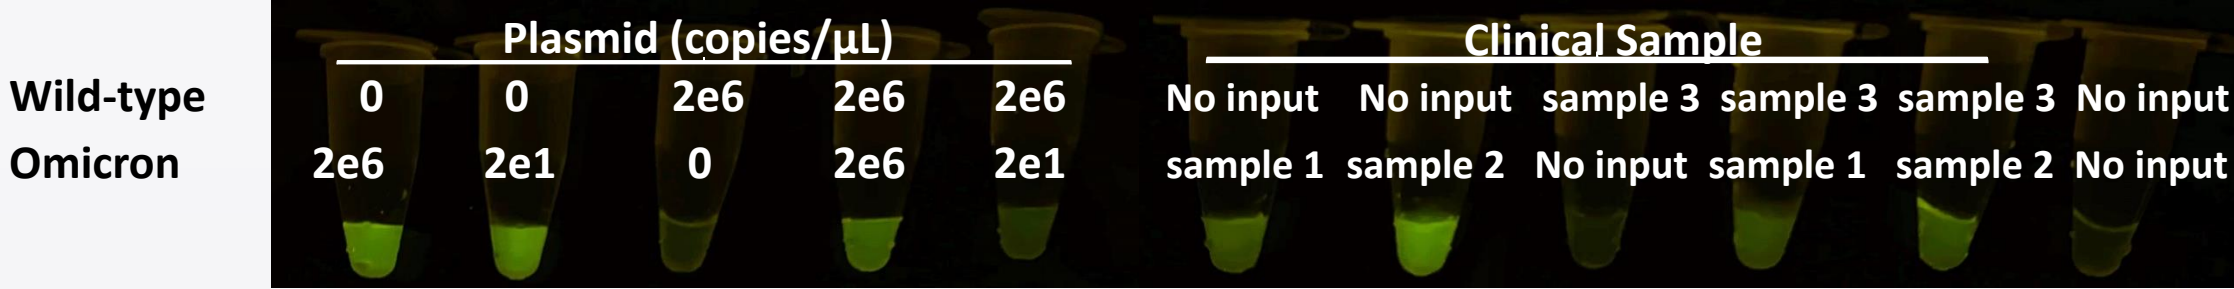

## crRNA-S-49X

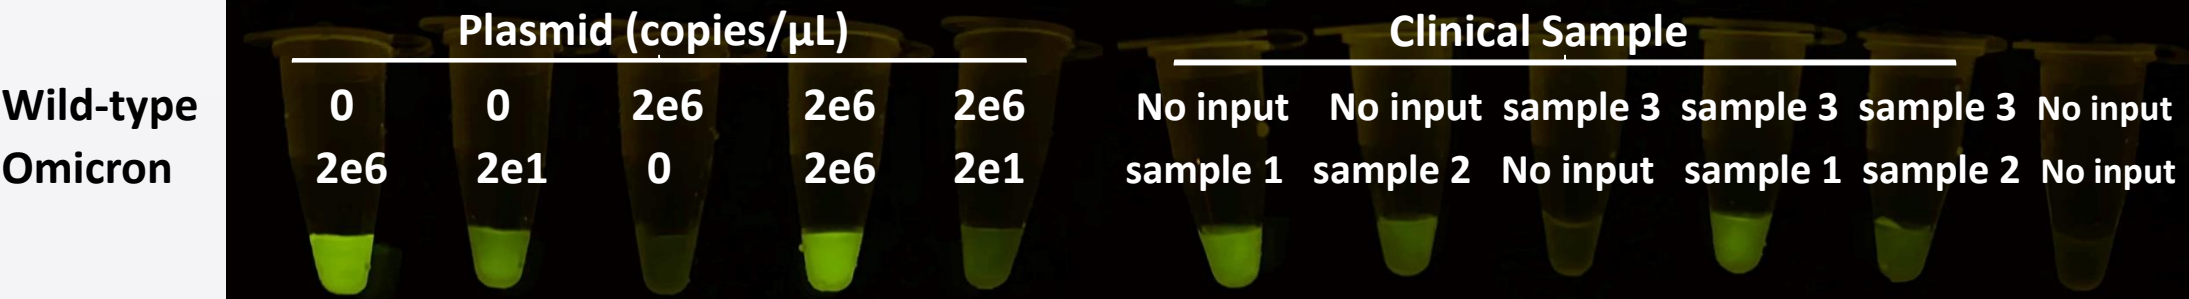

## crRNA-S-501N

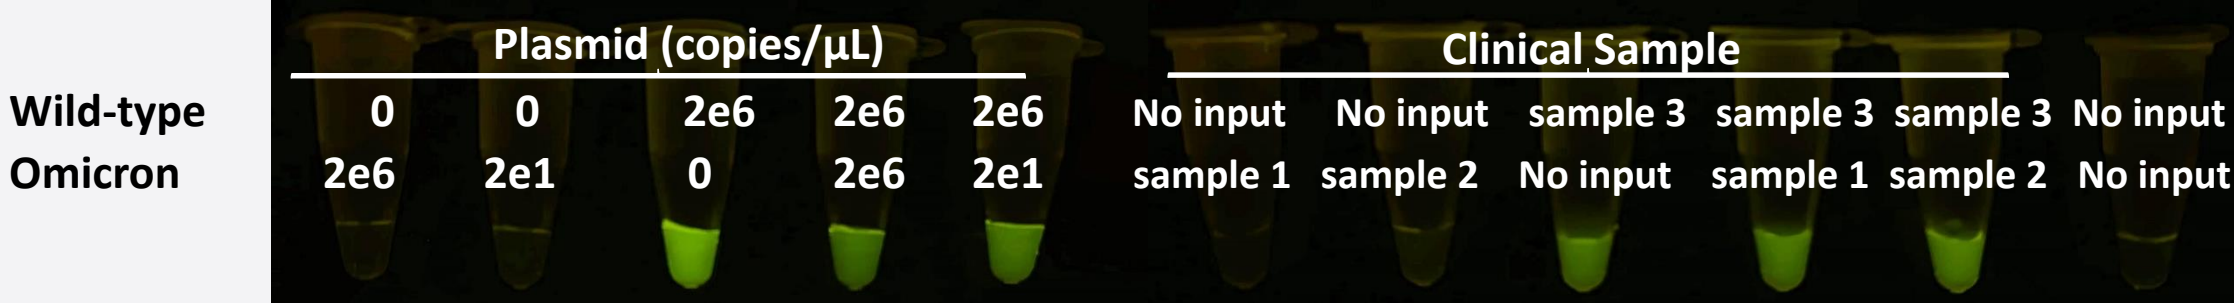

# Supplementary Figure S4

## A

### Standard curve

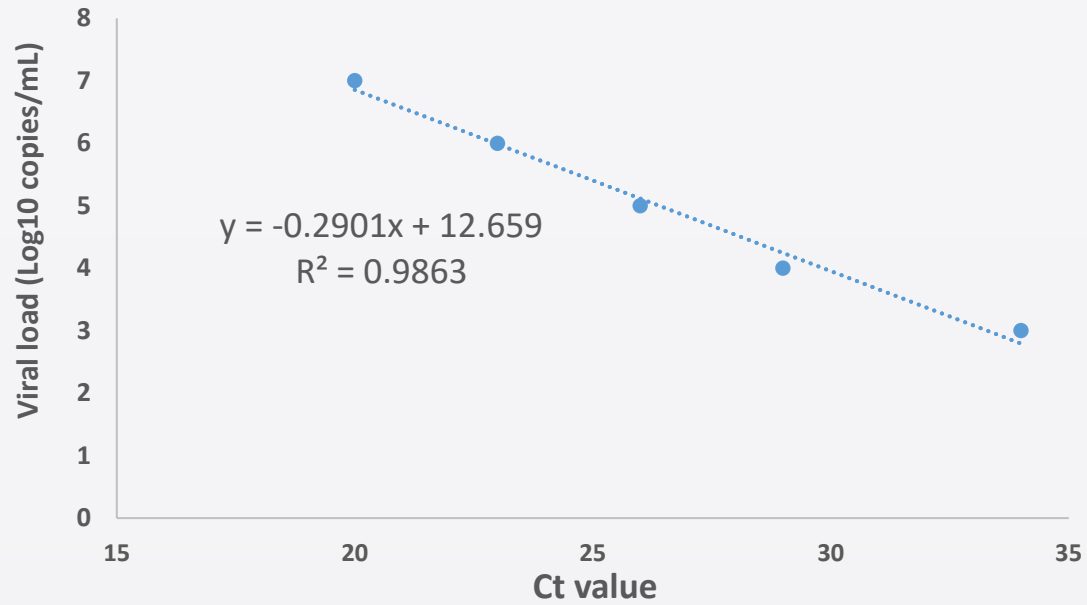

## B

### crRNA-S-49X

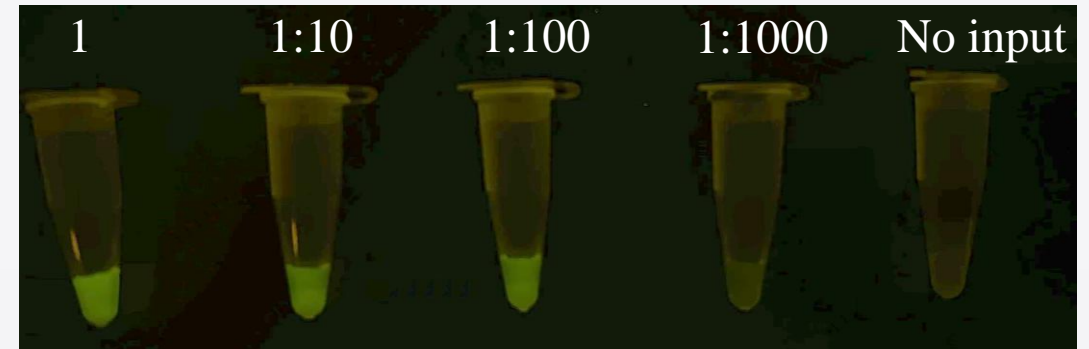

| Ct value                               | 20    |       |       |       |  |
|----------------------------------------|-------|-------|-------|-------|--|
| Estimated Viral load (Copies/ $\mu$ L) | $1e4$ | $1e3$ | $1e2$ | $1e1$ |  |
